# Supplementary material for: Assessing the Costs and Benefits of Insuring Psychological Services as Part of Medicare for Depression in Canada
Source: Atypon-hosted journal article supplement (doi:10.1176/appi.ps.201600395), 2017-05-15
Supplement: appi.ps.201600395.ds001.pdf [file appi.ps.201600395.ds001.pdf]

## On-Line Appendix

The model was run for 105 years with the last 40 years, representing a valid picture of a population with incident and prevalent depression, aged between 20 and 85 years of age, accounted for in the analyses.

Here are some simple case examples of how population estimates presented in table 4 were calculated, and which were based on health service use patterns, recovery rates, and outcomes presented in tables 1 and 2.

### Case example 1:

One cohort member presents with an incident episode of depression at age 67. The member consults with a health professional in that year and receives adequate care for depression, meeting guidelines. This member's first lifetime episode of depression lasts 148 days. This individual does not develop a second episode and does not use any other health services for a major depressive episode. The member leaves the model (i.e. is censored) at age 85.

In the total cohort, this member contributed 148 days in the depressed state using health services and 2407 days in the well state.

### Case example 2:

Another member presents with an incident episode of major depression at age 48 but does not initially consult. The episode last 147 days, until the individual attempts suicide and is hospitalized for this suicide attempt. This member is in the suicidal health state for 218 days. The individual is then followed and receives health services for depression. The individual has another two episodes in remaining lifetime totaling 505 days. The member leaves the model (i.e. is censored) at age 85.

In the cohort, this individual contributed 147 days in the depressed state not using health services; 505 days in the depressed state while using health services, 218 days in a suicidal state, was hospitalized once due to suicide attempt, and contributed 12635 days in the well state.

### Case example 3:

Another member presents with an incident episode of major depression at age 59. The individual does not seem to respond to health services received which are adequate (follow guidelines). The individual is in a chronic depressed state for 948 days. The individual attempts suicide for which there is a hospitalization. The individual is in a suicidal health state for 182.5 days. The individual dies by suicide following hospitalization at the age of 62.50 years.

In the cohort, this individual is censored at age 62.50 years with suicide after having contributed 148 days to the depressed state; 948 days to the chronic depressed state; 182.5 days to the suicidal state; with 1 hospitalization and 1 suicide attempt. This member did not contribute any days to the well state of the cohort.

**Table 1. Parameter estimates from published literature**

| <b>Variable</b>                                                                                                                                                         | <b>Base Case Values</b>          | <b>Reference</b>   |
|-------------------------------------------------------------------------------------------------------------------------------------------------------------------------|----------------------------------|--------------------|
| <b>Health states / Events</b>                                                                                                                                           |                                  |                    |
| Incidence of major depression                                                                                                                                           | 2.9%                             | 40                 |
| Persistent major depressive episode into following year                                                                                                                 | 20%                              | 41                 |
| Past year attempted suicide among individuals reporting a major depressive episode                                                                                      | 7.8%                             | 24                 |
| Past year attempted suicide among individuals reporting a major depressive episode not using or receiving adequate mental health care                                   | 9.13%                            | 42                 |
| Past year attempted suicide among individuals reporting a major depressive episode receiving adequate mental health care                                                | 6.80%                            | 42                 |
| Risk of repeat suicide attempt following attempt (median estimates)                                                                                                     |                                  |                    |
|                                                                                                                                                                         | Year 1<br>Year 1 to 4<br>Year >4 | 16%<br>21%;<br>23% |
| Risk of Suicide in year following attempt (median estimates)                                                                                                            | 1.8%                             | 43,44              |
| <b>TREATED Major Depression</b>                                                                                                                                         |                                  |                    |
| Time to 2 <sup>nd</sup> , 3 <sup>rd</sup> major depressive episode (i.e. time to relapse)                                                                               | 132 weeks                        | 48,49              |
| Length of 1 <sup>st</sup> episode                                                                                                                                       | 21 weeks                         |                    |
| Length of 2 <sup>nd</sup> episode                                                                                                                                       | 20 weeks                         |                    |
| Length of 3 <sup>rd</sup> episode                                                                                                                                       | 19 weeks                         |                    |
| Length of 4 <sup>th</sup> episode                                                                                                                                       | 21 weeks                         |                    |
| Length of 5 <sup>th</sup> episode                                                                                                                                       | 20 weeks                         |                    |
| Probability of persistent major depressive episode in 2 <sup>nd</sup> year                                                                                              | 62%                              |                    |
| Probability of persistent major depressive episode in 3 <sup>rd</sup> year                                                                                              | 73%                              |                    |
| Probability of persistent major depressive episode in 4 <sup>th</sup> year                                                                                              | 84%                              |                    |
| <b>Untreated Major Depression</b>                                                                                                                                       |                                  |                    |
| Time to 2 <sup>nd</sup> , 3 <sup>rd</sup> untreated major depressive episode (i.e. time to relapse)                                                                     | 48 weeks                         | 48,49              |
| Length of 2 <sup>nd</sup> untreated major depressive episode                                                                                                            | 17 weeks                         | 48-51              |
| Length of 3 <sup>rd</sup> untreated major depressive episode                                                                                                            | 29 weeks                         |                    |
| Length of 4 <sup>th</sup> untreated major depressive episode                                                                                                            | 31 weeks                         |                    |
| Length of 5 <sup>th</sup> - 9 <sup>th</sup> episode untreated major depressive episode                                                                                  | 22 weeks                         |                    |
| Probability of 2 <sup>nd</sup> untreated major depressive episode                                                                                                       | 0.5                              | 52                 |
| Probability of 3 <sup>rd</sup> untreated major depressive episode                                                                                                       | 0.7                              |                    |
| Probability of 4 <sup>th</sup> and 5 <sup>th</sup> untreated major depressive episode                                                                                   | 0.9                              |                    |
| <b>Adequate treatment Recovery (one lifetime episode) within year</b>                                                                                                   |                                  |                    |
| GP/FP only, psychiatrist only, GP/FP and psychiatrist, antidepressant                                                                                                   | 63%                              | 53-55              |
| Other mental health specialist only                                                                                                                                     | 54%                              | 54                 |
| GP/FP and other mental health specialist; psychiatrist and other mental health specialist; GP/FP and psychiatrist and other mental health specialist and antidepressant | 67%                              | 55                 |
| <b>Non Adequate Treatment Arm: Recovery</b>                                                                                                                             |                                  |                    |
| Not Adequate antidepressant and health service use for mental health reasons with any physician                                                                         | 24% – 30%                        | 54                 |
| Not Adequate health service use with other mental health specialist only                                                                                                | 25%                              | 54,55              |
| Spontaneous recovery without treatment                                                                                                                                  | 30%                              | 23                 |
| Relapse among those presenting spontaneous recovery without treatment                                                                                                   | 44%                              | 23                 |
| Length of antidepressant use (median)                                                                                                                                   | 365 days                         | 56                 |
| Persistent antidepressant use among incident users:                                                                                                                     |                                  |                    |
|                                                                                                                                                                         | 1 month<br>3 months              | 73%<br>59%         |
|                                                                                                                                                                         |                                  | 57                 |

|                         |     |  |
|-------------------------|-----|--|
| 6 months                | 46% |  |
| 1 – 2 years             | 33% |  |
| extrapolated to 3 years | 22% |  |

**Table 2. Costs and utilities used in model**

| Utilities for events/health states <sup>a</sup>                                                                                                                   | Base case Value |              |           | Source or reference |
|-------------------------------------------------------------------------------------------------------------------------------------------------------------------|-----------------|--------------|-----------|---------------------|
| Well/Recovery                                                                                                                                                     | 0.85            |              |           | 27                  |
| Well/Recovery in non-health service users <sup>b</sup>                                                                                                            | 0.72            |              |           |                     |
| Depressed among health service users (moderate depression)                                                                                                        | 0.33            |              |           | 58                  |
| Dysthymia/chronic depression (partial remission)                                                                                                                  | 0.58            |              |           | 27,58               |
| Suicidal (severe depression)                                                                                                                                      | 0.09            |              |           | 61-62               |
| Depressed, non-health service users                                                                                                                               | 0.30            |              |           | 58-60               |
| Dead                                                                                                                                                              | 0               |              |           | 61                  |
| Utility decrement associated with antidepressant use                                                                                                              | -0.005          |              |           | 27,62               |
| <b>Costs (in 2013 dollars)</b>                                                                                                                                    |                 |              |           |                     |
| <b>Health system costs</b>                                                                                                                                        | <b>Average</b>  | <b>Range</b> |           |                     |
| Annual healthcare costs: Healthy/well state (i.e. non depressed and non-suicidal)                                                                                 | \$2735          | \$2141       | \$3497    | 63                  |
| Per diem hospitalisation cost                                                                                                                                     | \$1084          |              |           | 64                  |
| Annual healthcare costs: Depression                                                                                                                               | \$3647          | \$2854       | \$4662    | 65                  |
| Excess costs associated with antidepressant use                                                                                                                   | \$1980          | \$426        | \$2232    | 32                  |
| Annual healthcare costs: Suicidal cases                                                                                                                           | \$8303          | \$1838       | \$45 188  | 66                  |
| Healthcare costs: Attempted suicide                                                                                                                               | \$14 229        | \$2042       | \$45 909  |                     |
| Healthcare and related costs: Suicide                                                                                                                             | \$26 270        | \$10 492     | \$108 230 |                     |
| <b>Indirect costs related to lost productivity</b>                                                                                                                |                 |              |           |                     |
| Cost of short term disability                                                                                                                                     | \$18 689        | \$16 693     | \$20 685  | 67-69               |
| Absenteeism and presenteeism costs                                                                                                                                | \$2382          | 0            | \$27 516  | 70                  |
| Friction cost method: average replacement is 3 months (range 1 and 12 months)                                                                                     | \$10 163        | \$3387       | \$40 653  | 66,71               |
| Human capital approach                                                                                                                                            | \$729 314       | \$515 886    | \$772 406 |                     |
| <sup>a</sup> Utility values were all based on the EQ-5D-5L                                                                                                        |                 |              |           |                     |
| <sup>b</sup> Utility values associated with the well/recovery state are associated with a slightly lower utility given that relapse rates are higher in non-users |                 |              |           |                     |
